# Supplementary material for: Assessing Worker and Pedestrian Exposure to Pollutant Emissions from Sidewalk Cleaning: A Comparative Analysis of Blowing and Jet Washing Techniques
Source: MDPI journal article supplement (doi:10.3390/air2020007), 2024-04-28
Supplement: s1 [file s1]

# Assessing Worker and Pedestrian Exposure to Pollutant Emissions from Sidewalk Cleaning: A Comparative Analysis of Blowing and Jet Washing Techniques

Hélène Niculita-Hirzel, Maria Serena Merli and Kyle Baikie

Table S1. Meteorological measurements during sampling rue de Genève

| Season                 | Time slot     | Relative Humidity (%)<br>[Min - Max] | Temperature (°C) [Min - Max] | Wind speed (m/s) | Atmospheric pressure |
|------------------------|---------------|--------------------------------------|------------------------------|------------------|----------------------|
| Autumn<br>(31.10.2022) | 09:00 - 11:00 | 48 - 70%                             | 15 - 25°C                    | 0.2              | 976 hPa              |
| Winter<br>(27.02.2023) | 07:10 - 11:17 | 48 - 52%                             | 3 - 6°C                      | 0.5 -1.7         | 966 hPa              |
| Spring<br>(08.05.2023) | 07:16 - 11:27 | 51 - 71%                             | 16 - 25°C                    | 0.4              | 975 hPa              |
| Summer<br>(10.07.2023) | 07:13 - 09:10 | 46 - 65%                             | 25 - 33°C                    | 0.1              | 976 hPa              |

Table S2. Meteorological measurements during sampling Quai de Cologny

| Season                 | Time slot     | Relative Humidity (%)<br>[Min - Max] | Temperature (°C) [Min - Max] | Wind speed (m/s) | Atmospheric pressure |
|------------------------|---------------|--------------------------------------|------------------------------|------------------|----------------------|
| Autumn<br>(31.10.2022) | 14:00 -16:00  | 55 - 99%                             | 20 - 23°C                    | 0.2              | 978 hPa              |
| Winter<br>(27.02.2023) | 13:45 - 16:00 | 47 - 58%                             | 5 - 6°C                      | 1.7 - 5.0        | 976 hPa              |
| Spring<br>(08.05.2023) | 13:46 - 14:53 | 42 - 67%                             | 19 - 29°C                    | 3.0 - 3.8        | 980 hPa              |
| Summer<br>(10.07.2023) | 10:15 - 11:55 | 56 - 68%                             | 28 - 31°C                    | 0.2- 0.4         | 982 hPa              |

Table S3. Total air volume sampled with IOM heads for bioaerosol analysis

| Season | Site            | Pump carrier          | m <sup>3</sup> | Duration (min) |
|--------|-----------------|-----------------------|----------------|----------------|
| Summer | Quai de Cologny | pedestrian            | 0.169          | 85             |
| Summer | rue de Genève   | Pony driver           | 0.304          | 152            |
| Summer | rue de Genève   | sweeper driver        | 0.302          | 151            |
| Summer | Quai de Cologny | Pony driver           | 0.191          | 96             |
| Summer | Quai de Cologny | water jet operator    | 0.180          | 90             |
| Summer | rue de Genève   | pedestrian            | 0.284          | 142            |
| Summer | rue de Genève   | water jet operator    | 0.292          | 146            |
| Summer | Quai de Cologny | sweeper driver        | 0.178          | 89             |
| Spring | rue de Genève   | blower                | 0.361          | 181            |
| Spring | rue de Genève   | blower                | 0.361          | 181            |
| Spring | rue de Genève   | sweeper driver        | 0.457          | 229            |
| Spring | rue de Genève   | pedestrian            | 0.346          | 173            |
| Spring | Quai de Cologny | blower                | 0.158          | 79             |
| Spring | Quai de Cologny | Pony driver           | 0.154          | 77             |
| Spring | Quai de Cologny | sweeper driver        | 0.150          | 75             |
| Spring | Quai de Cologny | pedestrian            | 0.117          | 59             |
| Winter | rue de Genève   | blower                | 0.295          | 148            |
| Winter | rue de Genève   | blower                | 0.312          | 156            |
| Winter | rue de Genève   | pedestrian (behind)   | 0.320          | 160            |
| Winter | rue de Genève   | sweeper driver        | 0.326          | 163            |
| Winter | Quai de Cologny | blower                | 0.128          | 64             |
| Winter | Quai de Cologny | pedestrian (behind)   | 0.130          | 65             |
| Winter | Quai de Cologny | pedestrian (follower) | 0.112          | 56             |
| Winter | Quai de Cologny | sweeper driver        | 0.139          | 70             |
| Autumn | rue de Genève   | blower                | 0.186          | 93             |
| Autumn | Quai de Cologny | blower                | 0.118          | 59             |

Table S4. Relative abundance of various ASVs detected in the breathing zone of a blower during blowing, along with their assigned taxonomy

| Kingdom  | Phylum         | Class               | Order            | Family            | Genus            | Species       | ASV    | Number of Reads | Relative Abundance |
|----------|----------------|---------------------|------------------|-------------------|------------------|---------------|--------|-----------------|--------------------|
| Bacteria | Proteobacteria | Gammaproteobacteria | Burkholderiales  | Oxalobacteraceae  | Massilia         | NA            | ASV2   | 2610            | 16.41406201        |
| Bacteria | Proteobacteria | Gammaproteobacteria | Burkholderiales  | Oxalobacteraceae  | Massilia         | NA            | ASV3   | 2157            | 13.56518458        |
| Bacteria | Proteobacteria | Gammaproteobacteria | Burkholderiales  | Oxalobacteraceae  | Massilia         | NA            | ASV9   | 1085            | 6.823470222        |
| Bacteria | Proteobacteria | Gammaproteobacteria | Pseudomonadales  | Pseudomonadaceae  | Pseudomonas      | rhizosphaerae | ASV12  | 827             | 5.200930759        |
| Bacteria | Proteobacteria | Gammaproteobacteria | Burkholderiales  | Oxalobacteraceae  | Massilia         | NA            | ASV16  | 781             | 4.911640777        |
| Bacteria | Proteobacteria | Gammaproteobacteria | Pseudomonadales  | Pseudomonadaceae  | Pseudomonas      | NA            | ASV13  | 750             | 4.716684485        |
| Bacteria | Proteobacteria | Gammaproteobacteria | Burkholderiales  | Oxalobacteraceae  | Massilia         | NA            | ASV20  | 704             | 4.427394503        |
| Bacteria | Proteobacteria | Gammaproteobacteria | Burkholderiales  | Oxalobacteraceae  | Massilia         | dura          | ASV7   | 686             | 4.314194076        |
| Bacteria | Proteobacteria | Gammaproteobacteria | Pseudomonadales  | Pseudomonadaceae  | Pseudomonas      | syringae      | ASV17  | 480             | 3.018678071        |
| Bacteria | Proteobacteria | Gammaproteobacteria | Pseudomonadales  | Moraxellaceae     | Psychrobacter    | alimentarius  | ASV54  | 286             | 1.798629017        |
| Bacteria | Proteobacteria | Gammaproteobacteria | Burkholderiales  | Oxalobacteraceae  | Massilia         | NA            | ASV64  | 163             | 1.025092761        |
| Bacteria | Proteobacteria | Gammaproteobacteria | Burkholderiales  | Oxalobacteraceae  | Massilia         | NA            | ASV112 | 138             | 0.867869945        |
| Bacteria | Proteobacteria | Gammaproteobacteria | Burkholderiales  | Oxalobacteraceae  | Massilia         | NA            | ASV113 | 132             | 0.830136469        |
| Bacteria | Proteobacteria | Gammaproteobacteria | Burkholderiales  | Oxalobacteraceae  | Massilia         | NA            | ASV118 | 126             | 0.792402994        |
| Bacteria | Proteobacteria | Gammaproteobacteria | Burkholderiales  | Oxalobacteraceae  | Massilia         | NA            | ASV123 | 110             | 0.691780391        |
| Bacteria | Proteobacteria | Gammaproteobacteria | Burkholderiales  | Oxalobacteraceae  | Massilia         | NA            | ASV70  | 109             | 0.685491479        |
| Bacteria | Proteobacteria | Gammaproteobacteria | Pseudomonadales  | Moraxellaceae     | Psychrobacter    | nivimaris     | ASV125 | 106             | 0.666624741        |
| Bacteria | Proteobacteria | Gammaproteobacteria | Burkholderiales  | Oxalobacteraceae  | Massilia         | NA            | ASV105 | 101             | 0.635180177        |
| Bacteria | Proteobacteria | Gammaproteobacteria | Burkholderiales  | Comamonadaceae    | Variovorax       | NA            | ASV96  | 101             | 0.635180177        |
| Bacteria | Proteobacteria | Gammaproteobacteria | Burkholderiales  | Oxalobacteraceae  | Massilia         | NA            | ASV94  | 78              | 0.490535186        |
| Bacteria | Firmicutes     | Bacilli             | Paenibacillales  | Paenibacillaceae  | Saccharibacillus | sacchari      | ASV153 | 76              | 0.477957361        |
| Bacteria | Proteobacteria | Alphaproteobacteria | Sphingomonadales | Sphingomonadaceae | Sphingomonas     | melonis       | ASV84  | 76              | 0.477957361        |
| Bacteria | Bacteroidota   | Bacteroidia         | Flavobacteriales | Flavobacteriaceae | Subsaxibacter    | NA            | ASV156 | 75              | 0.471668449        |
| Bacteria | Proteobacteria | Alphaproteobacteria | Sphingomonadales | Sphingomonadaceae | Sphingomonas     | faeni         | ASV56  | 73              | 0.459090623        |
| Bacteria | Proteobacteria | Gammaproteobacteria | Pseudomonadales  | Pseudomonadaceae  | Pseudomonas      | umsongensis   | ASV163 | 72              | 0.452801711        |
| Bacteria | Proteobacteria | Gammaproteobacteria | Burkholderiales  | Oxalobacteraceae  | Massilia         | NA            | ASV165 | 71              | 0.446512798        |
| Bacteria | Proteobacteria | Gammaproteobacteria | Xanthomonadales  | Xanthomonadaceae  | Thermomonas      | NA            | ASV168 | 70              | 0.440223885        |
| Bacteria | Proteobacteria | Gammaproteobacteria | Burkholderiales  | Oxalobacteraceae  | Massilia         | plicata       | ASV33  | 66              | 0.415068235        |
| Bacteria | Proteobacteria | Gammaproteobacteria | Burkholderiales  | Oxalobacteraceae  | Massilia         | NA            | ASV93  | 66              | 0.415068235        |

|          |                   |                     |                    |                     |                                                    |                |        |    |             |
|----------|-------------------|---------------------|--------------------|---------------------|----------------------------------------------------|----------------|--------|----|-------------|
| Bacteria | Bacteroidota      | Bacteroidia         | Sphingobacteriales | Sphingobacteriaceae | Pedobacter                                         | NA             | ASV85  | 66 | 0.415068235 |
| Bacteria | Proteobacteria    | Gammaproteobacteria | Burkholderiales    | Oxalobacteraceae    | Massilia                                           | NA             | ASV129 | 61 | 0.383623671 |
| Bacteria | Proteobacteria    | Gammaproteobacteria | Burkholderiales    | Comamonadaceae      | Variovorax                                         | NA             | ASV185 | 61 | 0.383623671 |
| Bacteria | Proteobacteria    | Alphaproteobacteria | Sphingomonadales   | Sphingomonadaceae   | Sphingomonas                                       | echinoides     | ASV99  | 59 | 0.371045846 |
| Bacteria | Bacteroidota      | Bacteroidia         | Flavobacteriales   | Flavobacteriaceae   | Flavobacterium                                     | subsaxonicum   | ASV160 | 58 | 0.364756934 |
| Bacteria | Proteobacteria    | Gammaproteobacteria | Pseudomonadales    | Pseudomonadaceae    | Pseudomonas                                        | gingeri        | ASV208 | 49 | 0.30815672  |
| Bacteria | Proteobacteria    | Alphaproteobacteria | Sphingomonadales   | Sphingomonadaceae   | Novosphingobium                                    | resinovorum    | ASV82  | 46 | 0.289289982 |
| Bacteria | Proteobacteria    | Gammaproteobacteria | Burkholderiales    | Oxalobacteraceae    | Massilia                                           | NA             | ASV66  | 44 | 0.276712156 |
| Bacteria | Proteobacteria    | Gammaproteobacteria | Burkholderiales    | Oxalobacteraceae    | Massilia                                           | NA             | ASV73  | 42 | 0.264134331 |
| Bacteria | Proteobacteria    | Alphaproteobacteria | Rhodobacterales    | Rhodobacteraceae    | Paracoccus                                         | NA             | ASV137 | 42 | 0.264134331 |
| Bacteria | Proteobacteria    | Gammaproteobacteria | Pseudomonadales    | Pseudomonadaceae    | Pseudomonas                                        | NA             | ASV111 | 41 | 0.257845419 |
| Bacteria | Proteobacteria    | Gammaproteobacteria | Burkholderiales    | Comamonadaceae      | Polaromonas                                        | NA             | ASV253 | 40 | 0.251556506 |
| Bacteria | Proteobacteria    | Gammaproteobacteria | Burkholderiales    | Comamonadaceae      | Variovorax                                         | NA             | ASV257 | 39 | 0.245267593 |
| Bacteria | Proteobacteria    | Gammaproteobacteria | Enterobacterales   | Erwiniaceae         | Erwinia                                            | billingiae     | ASV74  | 38 | 0.238978681 |
| Bacteria | Bacteroidota      | Bacteroidia         | Cytophagales       | Hymenobacteraceae   | Hymenobacter                                       | NA             | ASV262 | 38 | 0.238978681 |
| Bacteria | Proteobacteria    | Gammaproteobacteria | Pseudomonadales    | Pseudomonadaceae    | Pseudomonas                                        | NA             | ASV210 | 38 | 0.238978681 |
| Bacteria | Planctomycetota   | Phycisphaerae       | Tepidisphaerales   | Tepidisphaeraceae   | Tepidisphaera                                      | NA             | ASV265 | 37 | 0.232689768 |
| Bacteria | Bacteroidota      | Bacteroidia         | Flavobacteriales   | Weeksellaceae       | Chryseobacterium                                   | chaponense     | ASV220 | 36 | 0.226400855 |
| Bacteria | Proteobacteria    | Gammaproteobacteria | Burkholderiales    | Oxalobacteraceae    | Massilia                                           | NA             | ASV61  | 36 | 0.226400855 |
| Bacteria | Proteobacteria    | Gammaproteobacteria | Burkholderiales    | Comamonadaceae      | Rhizobacter                                        | gummiphilus    | ASV270 | 36 | 0.226400855 |
| Bacteria | Proteobacteria    | Alphaproteobacteria | Rhizobiales        | Rhizobiaceae        | Allorhizobium-Neorhizobium-Pararhizobium-Rhizobium | NA             | ASV170 | 35 | 0.220111943 |
| Bacteria | Proteobacteria    | Gammaproteobacteria | Pseudomonadales    | Pseudomonadaceae    | Pseudomonas                                        | rhizosphaerae  | ASV83  | 35 | 0.220111943 |
| Bacteria | Proteobacteria    | Gammaproteobacteria | Pseudomonadales    | Moraxellaceae       | Psychrobacter                                      | cryohalolentis | ASV275 | 35 | 0.220111943 |
| Bacteria | Proteobacteria    | Gammaproteobacteria | Pseudomonadales    | Moraxellaceae       | Psychrobacter                                      | urativorans    | ASV276 | 35 | 0.220111943 |
| Bacteria | Proteobacteria    | Gammaproteobacteria | Burkholderiales    | Oxalobacteraceae    | Massilia                                           | NA             | ASV121 | 34 | 0.21382303  |
| Bacteria | Bacteroidota      | Bacteroidia         | Chitinophagales    | Chitinophagaceae    | NA                                                 | NA             | ASV285 | 34 | 0.21382303  |
| Bacteria | Proteobacteria    | Alphaproteobacteria | Rhizobiales        | Rhizobiaceae        | Allorhizobium-Neorhizobium-Pararhizobium-Rhizobium | NA             | ASV291 | 33 | 0.207534117 |
| Bacteria | Actinobacteriota  | Actinobacteria      | Frankiales         | Nakamurellaceae     | Nakamurella                                        | NA             | ASV290 | 33 | 0.207534117 |
| Bacteria | Proteobacteria    | Gammaproteobacteria | Pseudomonadales    | Cellvibrionaceae    | Cellvibrio                                         | NA             | ASV216 | 32 | 0.201245205 |
| Bacteria | Verrucomicrobiota | Verrucomicrobiae    | Verrucomicrobiales | Rubritaleaceae      | Luteolibacter                                      | NA             | ASV207 | 32 | 0.201245205 |
| Bacteria | Proteobacteria    | Alphaproteobacteria | Sphingomonadales   | Sphingomonadaceae   | Qipengyuania                                       | NA             | ASV199 | 32 | 0.201245205 |
| Bacteria | Bacteroidota      | Bacteroidia         | Flavobacteriales   | Weeksellaceae       | Chryseobacterium                                   | halperniae     | ASV59  | 31 | 0.194956292 |

|          |                   |                     |                    |                     |                                                    |            |        |    |             |
|----------|-------------------|---------------------|--------------------|---------------------|----------------------------------------------------|------------|--------|----|-------------|
| Bacteria | Bacteroidota      | Bacteroidia         | Flavobacteriales   | Weeksellaceae       | Chryseobacterium                                   | NA         | ASV303 | 31 | 0.194956292 |
| Bacteria | Proteobacteria    | Alphaproteobacteria | Rhizobiales        | Devosiaceae         | Devosia                                            | NA         | ASV310 | 30 | 0.188667379 |
| Bacteria | Proteobacteria    | Alphaproteobacteria | Rhodobacterales    | Rhodobacteraceae    | Paracoccus                                         | NA         | ASV309 | 30 | 0.188667379 |
| Bacteria | Proteobacteria    | Alphaproteobacteria | Acetobacterales    | Acetobacteraceae    | Roseomonas                                         | NA         | ASV224 | 30 | 0.188667379 |
| Bacteria | Proteobacteria    | Gammaproteobacteria | Burkholderiales    | Comamonadaceae      | Simplicispira                                      | NA         | ASV308 | 30 | 0.188667379 |
| Bacteria | Proteobacteria    | Alphaproteobacteria | Rhizobiales        | Rhizobiaceae        | Allorhizobium-Neorhizobium-Pararhizobium-Rhizobium | vitis      | ASV313 | 29 | 0.182378467 |
| Bacteria | Planctomycetota   | Phycisphaerae       | Tepidisphaerales   | Tepidisphaeraceae   | NA                                                 | NA         | ASV315 | 29 | 0.182378467 |
| Bacteria | Proteobacteria    | Gammaproteobacteria | Burkholderiales    | Oxalobacteraceae    | Noviherbaspirillum                                 | NA         | ASV187 | 29 | 0.182378467 |
| Bacteria | Bacteroidota      | Bacteroidia         | Sphingobacteriales | Sphingobacteriaceae | Pedobacter                                         | NA         | ASV24  | 29 | 0.182378467 |
| Bacteria | Proteobacteria    | Gammaproteobacteria | Pseudomonadales    | Pseudomonadaceae    | Pseudomonas                                        | NA         | ASV90  | 29 | 0.182378467 |
| Bacteria | Proteobacteria    | Gammaproteobacteria | Burkholderiales    | Comamonadaceae      | Rhizobacter                                        | NA         | ASV314 | 29 | 0.182378467 |
| Bacteria | Actinobacteriota  | Actinobacteria      | Micrococcales      | Microbacteriaceae   | NA                                                 | NA         | ASV323 | 28 | 0.176089554 |
| Bacteria | Cyanobacteria     | Cyanobacteriia      | Chloroplast        | NA                  | NA                                                 | NA         | ASV322 | 28 | 0.176089554 |
| Bacteria | Proteobacteria    | Alphaproteobacteria | Caulobacterales    | Caulobacteraceae    | Brevundimonas                                      | NA         | ASV167 | 27 | 0.169800641 |
| Bacteria | Proteobacteria    | Alphaproteobacteria | Rhizobiales        | Beijerinckiaceae    | Methylobacterium-                                  | adhaesivum | ASV277 | 27 | 0.169800641 |
| Bacteria | Proteobacteria    | Alphaproteobacteria | Caulobacterales    | Caulobacteraceae    | Brevundimonas                                      | NA         | ASV188 | 26 | 0.163511729 |
| Bacteria | Proteobacteria    | Alphaproteobacteria | Sphingomonadales   | Sphingomonadaceae   | Novosphingobium                                    | NA         | ASV183 | 26 | 0.163511729 |
| Bacteria | Proteobacteria    | Gammaproteobacteria | Enterobacterales   | Erwiniaceae         | Pantoea                                            | vagans     | ASV32  | 26 | 0.163511729 |
| Bacteria | Bacteroidota      | Bacteroidia         | Chitinophagales    | Chitinophagaceae    | Ferruginibacter                                    | NA         | ASV342 | 25 | 0.157222816 |
| Bacteria | Proteobacteria    | Gammaproteobacteria | Pseudomonadales    | Pseudomonadaceae    | Pseudomonas                                        | corrugata  | ASV58  | 25 | 0.157222816 |
| Bacteria | Proteobacteria    | Alphaproteobacteria | Caulobacterales    | Caulobacteraceae    | Caulobacter                                        | NA         | ASV352 | 24 | 0.150933904 |
| Bacteria | Bacteroidota      | Bacteroidia         | Flavobacteriales   | Flavobacteriaceae   | Flavobacterium                                     | aquidurens | ASV229 | 24 | 0.150933904 |
| Bacteria | Bacteroidota      | Bacteroidia         | Flavobacteriales   | Flavobacteriaceae   | Gelidibacter                                       | NA         | ASV353 | 24 | 0.150933904 |
| Bacteria | Proteobacteria    | Gammaproteobacteria | Burkholderiales    | Oxalobacteraceae    | Massilia                                           | NA         | ASV62  | 24 | 0.150933904 |
| Bacteria | Bacteroidota      | Bacteroidia         | Sphingobacteriales | Sphingobacteriaceae | Pedobacter                                         | NA         | ASV351 | 24 | 0.150933904 |
| Bacteria | Proteobacteria    | Gammaproteobacteria | Burkholderiales    | Comamonadaceae      | Variovorax                                         | NA         | ASV143 | 24 | 0.150933904 |
| Bacteria | Proteobacteria    | Gammaproteobacteria | Pseudomonadales    | Moraxellaceae       | Acinetobacter                                      | NA         | ASV363 | 23 | 0.144644991 |
| Bacteria | Verrucomicrobiota | Verrucomicrobiae    | Chthoniobacterales | Chthoniobacteraceae | Chthoniobacter                                     | NA         | ASV364 | 23 | 0.144644991 |
| Bacteria | Verrucomicrobiota | Verrucomicrobiae    | Verrucomicrobiales | Rubritaleaceae      | Luteolibacter                                      | NA         | ASV362 | 23 | 0.144644991 |
| Bacteria | Proteobacteria    | Gammaproteobacteria | Burkholderiales    | Comamonadaceae      | NA                                                 | NA         | ASV241 | 22 | 0.138356078 |
| Bacteria | Acidobacteriota   | Vicinamibacteria    | Vicinamibacterales | NA                  | NA                                                 | NA         | ASV374 | 22 | 0.138356078 |
| Bacteria | Bacteroidota      | Bacteroidia         | Sphingobacteriales | Sphingobacteriaceae | Pedobacter                                         | NA         | ASV375 | 22 | 0.138356078 |

|          |                   |                     |                    |                      |                      |                     |        |    |             |
|----------|-------------------|---------------------|--------------------|----------------------|----------------------|---------------------|--------|----|-------------|
| Bacteria | Proteobacteria    | Gammaproteobacteria | Burkholderiales    | Comamonadaceae       | Simplicispira        | NA                  | ASV372 | 22 | 0.138356078 |
| Bacteria | Proteobacteria    | Alphaproteobacteria | Sphingomonadales   | Sphingomonadaceae    | Sphingomonas         | astaxanthinifaciens | ASV373 | 22 | 0.138356078 |
| Bacteria | Cyanobacteria     | Cyanobacteriia      | Chloroplast        | NA                   | NA                   | NA                  | ASV321 | 21 | 0.132067166 |
| Bacteria | Bacteroidota      | Bacteroidia         | Sphingobacteriales | Sphingobacteriaceae  | Pedobacter           | NA                  | ASV240 | 21 | 0.132067166 |
| Bacteria | Proteobacteria    | Gammaproteobacteria | Xanthomonadales    | Xanthomonadaceae     | Pseudoxanthomonas    | NA                  | ASV386 | 21 | 0.132067166 |
| Bacteria | Actinobacteriota  | Actinobacteria      | Micromonosporales  | Micromonosporaceae   | Actinoplanes         | derwentensis        | ASV402 | 20 | 0.125778253 |
| Bacteria | Proteobacteria    | Alphaproteobacteria | Caulobacterales    | Caulobacteraceae     | Brevundimonas        | intermedia          | ASV206 | 20 | 0.125778253 |
| Bacteria | Actinobacteriota  | Actinobacteria      | Micrococcales      | Micrococcaceae       | Paeniglutamicibacter | NA                  | ASV403 | 20 | 0.125778253 |
| Bacteria | Proteobacteria    | Gammaproteobacteria | Burkholderiales    | Comamonadaceae       | Acidovorax           | NA                  | ASV101 | 19 | 0.11948934  |
| Bacteria | Bacteroidota      | Bacteroidia         | Cytophagales       | Hymenobacteraceae    | Hymenobacter         | NA                  | ASV416 | 19 | 0.11948934  |
| Bacteria | Bacteroidota      | Bacteroidia         | Cytophagales       | Hymenobacteraceae    | Hymenobacter         | norwichensis        | ASV413 | 19 | 0.11948934  |
| Bacteria | Bacteroidota      | Bacteroidia         | Chitinophagales    | Chitinophagaceae     | NA                   | NA                  | ASV414 | 19 | 0.11948934  |
| Bacteria | Planctomycetota   | Phycisphaerae       | Tepidisphaerales   | WD2101 soil group    | NA                   | NA                  | ASV417 | 19 | 0.11948934  |
| Bacteria | Actinobacteriota  | Actinobacteria      | Pseudonocardiales  | Pseudonocardaceae    | Pseudonocardia       | NA                  | ASV415 | 19 | 0.11948934  |
| Bacteria | Proteobacteria    | Alphaproteobacteria | Rhodobacterales    | Rhodobacteraceae     | Rubellimicrobium     | NA                  | ASV247 | 19 | 0.11948934  |
| Bacteria | Actinobacteriota  | Actinobacteria      | Frankiales         | Geodermatophilaceae  | Blastococcus         | aggregatus          | ASV269 | 18 | 0.113200428 |
| Bacteria | Bacteroidota      | Bacteroidia         | Cytophagales       | Hymenobacteraceae    | Hymenobacter         | NA                  | ASV423 | 18 | 0.113200428 |
| Bacteria | Actinobacteriota  | Actinobacteria      | Micrococcales      | Micrococcaceae       | Kocuria              | rosea               | ASV424 | 18 | 0.113200428 |
| Bacteria | Proteobacteria    | Alphaproteobacteria | Sphingomonadales   | Sphingomonadaceae    | Sphingomonas         | NA                  | ASV425 | 18 | 0.113200428 |
| Bacteria | Cyanobacteria     | Cyanobacteriia      | Cyanobacteriales   | Chroococcidiopsaceae | Aliterella           | NA                  | ASV435 | 17 | 0.106911515 |
| Bacteria | Bacteroidota      | Bacteroidia         | Chitinophagales    | Chitinophagaceae     | Ferruginibacter      | NA                  | ASV438 | 17 | 0.106911515 |
| Bacteria | Proteobacteria    | Alphaproteobacteria | Sphingomonadales   | Sphingomonadaceae    | Sphingomonas         | koreensis           | ASV437 | 17 | 0.106911515 |
| Bacteria | Proteobacteria    | Gammaproteobacteria | Burkholderiales    | Comamonadaceae       | Variovorax           | NA                  | ASV434 | 17 | 0.106911515 |
| Bacteria | Proteobacteria    | Gammaproteobacteria | Burkholderiales    | Comamonadaceae       | Variovorax           | NA                  | ASV436 | 17 | 0.106911515 |
| Bacteria | Bacteroidota      | Bacteroidia         | Flavobacteriales   | Flavobacteriaceae    | Arenibacter          | NA                  | ASV451 | 16 | 0.100622602 |
| Bacteria | Proteobacteria    | Alphaproteobacteria | Caulobacterales    | Caulobacteraceae     | Brevundimonas        | NA                  | ASV79  | 16 | 0.100622602 |
| Bacteria | Verrucomicrobiota | Verrucomicrobiae    | Chthoniobacterales | Chthoniobacteraceae  | Chthoniobacter       | NA                  | ASV447 | 16 | 0.100622602 |
| Bacteria | Proteobacteria    | Gammaproteobacteria | Burkholderiales    | Comamonadaceae       | Leptothrix           | NA                  | ASV453 | 16 | 0.100622602 |
| Bacteria | Verrucomicrobiota | Verrucomicrobiae    | Verrucomicrobiales | Rubritaleaceae       | Luteolibacter        | NA                  | ASV448 | 16 | 0.100622602 |
| Bacteria | Chloroflexi       | Chloroflexia        | Thermomicrobiales  | JG30-KF-CM45         | NA                   | NA                  | ASV449 | 16 | 0.100622602 |
| Bacteria | Chloroflexi       | Chloroflexia        | Thermomicrobiales  | JG30-KF-CM45         | NA                   | NA                  | ASV450 | 16 | 0.100622602 |
| Bacteria | Proteobacteria    | Gammaproteobacteria | Pseudomonadales    | Moraxellaceae        | Psychrobacter        | faecalis            | ASV254 | 16 | 0.100622602 |
| Bacteria | Proteobacteria    | Alphaproteobacteria | Sphingomonadales   | Sphingomonadaceae    | Sphingomonas         | NA                  | ASV452 | 16 | 0.100622602 |

|          |                   |                     |                     |                     |                           |               |        |    |             |
|----------|-------------------|---------------------|---------------------|---------------------|---------------------------|---------------|--------|----|-------------|
| Bacteria | Proteobacteria    | Gammaproteobacteria | Burkholderiales     | Comamonadaceae      | Variovorax                | NA            | ASV454 | 16 | 0.100622602 |
| Bacteria | Acidobacteriota   | Blastocatellia      | Blastocatellales    | Blastocatellaceae   | JGI 0001001-H03           | NA            | ASV469 | 15 | 0.09433369  |
| Bacteria | Actinobacteriota  | Actinobacteria      | Propionibacteriales | Nocardioideaceae    | Marmoricola               | NA            | ASV341 | 15 | 0.09433369  |
| Bacteria | Proteobacteria    | Gammaproteobacteria | Pseudomonadales     | Moraxellaceae       | Psychrobacter             | maritimus     | ASV470 | 15 | 0.09433369  |
| Bacteria | Proteobacteria    | Alphaproteobacteria | Acetobacterales     | Acetobacteraceae    | Roseomonas                | NA            | ASV467 | 15 | 0.09433369  |
| Bacteria | Proteobacteria    | Gammaproteobacteria | Burkholderiales     | Comamonadaceae      | Simplicispira             | NA            | ASV471 | 15 | 0.09433369  |
| Bacteria | Proteobacteria    | Alphaproteobacteria | Sphingomonadales    | Sphingomonadaceae   | Sphingomonas              | NA            | ASV215 | 15 | 0.09433369  |
| Bacteria | Proteobacteria    | Alphaproteobacteria | Sphingomonadales    | Sphingomonadaceae   | Sphingomonas              | glacialis     | ASV256 | 15 | 0.09433369  |
| Bacteria | Proteobacteria    | Gammaproteobacteria | Burkholderiales     | Comamonadaceae      | Xylophilus                | NA            | ASV468 | 15 | 0.09433369  |
| Bacteria | Verrucomicrobiota | Verrucomicrobiae    | Verrucomicrobiales  | Rubritaleaceae      | Luteolibacter             | NA            | ASV487 | 14 | 0.088044777 |
| Bacteria | Planctomycetota   | Phycisphaerae       | Tepidisphaerales    | Tepidisphaeraceae   | NA                        | NA            | ASV490 | 14 | 0.088044777 |
| Bacteria | Planctomycetota   | Phycisphaerae       | Tepidisphaerales    | WD2101 soil group   | NA                        | NA            | ASV491 | 14 | 0.088044777 |
| Bacteria | Proteobacteria    | Alphaproteobacteria | Rhodobacterales     | Rhodobacteraceae    | NA                        | NA            | ASV486 | 14 | 0.088044777 |
| Bacteria | Verrucomicrobiota | Verrucomicrobiae    | Verrucomicrobiales  | Verrucomicrobiaceae | NA                        | NA            | ASV488 | 14 | 0.088044777 |
| Bacteria | Proteobacteria    | Alphaproteobacteria | Azospirillales      | Azospirillaceae     | Skermanella               | NA            | ASV239 | 14 | 0.088044777 |
| Bacteria | Proteobacteria    | Alphaproteobacteria | Sphingomonadales    | Sphingomonadaceae   | Sphingomonas              | NA            | ASV489 | 14 | 0.088044777 |
| Bacteria | Proteobacteria    | Alphaproteobacteria | Sphingomonadales    | Sphingomonadaceae   | Altererythrobacter        | NA            | ASV307 | 13 | 0.081755864 |
| Bacteria | Proteobacteria    | Alphaproteobacteria | Caulobacterales     | Caulobacteraceae    | Brevundimonas             | NA            | ASV192 | 13 | 0.081755864 |
| Bacteria | Proteobacteria    | Alphaproteobacteria | Caulobacterales     | Caulobacteraceae    | Brevundimonas             | subvibrioides | ASV333 | 13 | 0.081755864 |
| Bacteria | Bacteroidota      | Bacteroidia         | Cytophagales        | Hymenobacteraceae   | Hymenobacter              | NA            | ASV506 | 13 | 0.081755864 |
| Bacteria | Acidobacteriota   | Blastocatellia      | Blastocatellales    | Blastocatellaceae   | NA                        | NA            | ASV504 | 13 | 0.081755864 |
| Bacteria | Actinobacteriota  | Actinobacteria      | Micrococcales       | Dermatophilaceae    | NA                        | NA            | ASV507 | 13 | 0.081755864 |
| Bacteria | Patescibacteria   | Saccharimonadia     | Saccharimonadales   | NA                  | NA                        | NA            | ASV502 | 13 | 0.081755864 |
| Bacteria | Bacteroidota      | Bacteroidia         | Sphingobacteriales  | Sphingobacteriaceae | Pedobacter                | NA            | ASV508 | 13 | 0.081755864 |
| Bacteria | Cyanobacteria     | Cyanobacteriia      | Cyanobacteriales    | Nostocaceae         | Scytonema UTEX 2349       | NA            | ASV505 | 13 | 0.081755864 |
| Bacteria | Proteobacteria    | Alphaproteobacteria | Sphingomonadales    | Sphingomonadaceae   | Sphingomonas              | NA            | ASV503 | 13 | 0.081755864 |
| Bacteria | Verrucomicrobiota | Verrucomicrobiae    | Chthoniobacteriales | Chthoniobacteraceae | LD29                      | NA            | ASV521 | 12 | 0.075466952 |
| Bacteria | Planctomycetota   | Phycisphaerae       | Tepidisphaerales    | WD2101 soil group   | NA                        | NA            | ASV520 | 12 | 0.075466952 |
| Bacteria | Actinobacteriota  | Actinobacteria      | Micrococcales       | Sanguibacteraceae   | Sanguibacter-Flavimobilis | keddieii      | ASV522 | 12 | 0.075466952 |
| Bacteria | Proteobacteria    | Alphaproteobacteria | Rhizobiales         | Beijerinckiaceae    | 1174-901-12               | NA            | ASV538 | 11 | 0.069178039 |
| Bacteria | Actinobacteriota  | Actinobacteria      | Pseudonocardiales   | Pseudonocardaceae   | Actinomycetospora         | NA            | ASV536 | 11 | 0.069178039 |
| Bacteria | Proteobacteria    | Gammaproteobacteria | Xanthomonadales     | Xanthomonadaceae    | Arenimonas                | NA            | ASV539 | 11 | 0.069178039 |
| Bacteria | Bacteroidota      | Bacteroidia         | Flavobacteriales    | Weeksellaceae       | Chryseobacterium          | NA            | ASV541 | 11 | 0.069178039 |



|          |                   |                     |                           |                     |                          |                 |        |    |             |
|----------|-------------------|---------------------|---------------------------|---------------------|--------------------------|-----------------|--------|----|-------------|
| Bacteria | Proteobacteria    | Gammaproteobacteria | Xanthomonadales           | Rhodanobacteraceae  | Dokdonella               | NA              | ASV537 | 11 | 0.069178039 |
| Bacteria | Bacteroidota      | Bacteroidia         | Cytophagales              | Spirosomaceae       | Dyadobacter              | NA              | ASV540 | 11 | 0.069178039 |
| Bacteria | Verrucomicrobiota | Verrucomicrobiae    | Verrucomicrobiales        | Rubritaleaceae      | Luteolibacter            | NA              | ASV565 | 10 | 0.062889126 |
| Bacteria | Cyanobacteria     | Cyanobacteriia      | Chloroplast<br>Candidatus | NA                  | NA                       | NA              | ASV562 | 10 | 0.062889126 |
| Bacteria | Patescibacteria   | Parcubacteria       | Nomurabacteria            | NA                  | NA                       | NA              | ASV564 | 10 | 0.062889126 |
| Bacteria | Proteobacteria    | Gammaproteobacteria | Burkholderiales           | Nitrosomonadaceae   | Nitrosospira             | NA              | ASV563 | 10 | 0.062889126 |
| Bacteria | Verrucomicrobiota | Verrucomicrobiae    | Chthoniobacterales        | Terrimicrobiaceae   | Terrimicrobium           | NA              | ASV561 | 10 | 0.062889126 |
| Bacteria | Verrucomicrobiota | Verrucomicrobiae    | Chthoniobacterales        | Chthoniobacteraceae | Chthoniobacter           | NA              | ASV580 | 9  | 0.056600214 |
| Bacteria | Bacteroidota      | Bacteroidia         | Cytophagales              | Hymenobacteraceae   | Hymenobacter             | roseosalivarius | ASV588 | 9  | 0.056600214 |
| Bacteria | Acidobacteriota   | Vicinamibacteria    | Vicinamibacterales        | NA                  | NA                       | NA              | ASV581 | 9  | 0.056600214 |
| Bacteria | Cyanobacteria     | Cyanobacteriia      | Chloroplast               | NA                  | NA                       | NA              | ASV582 | 9  | 0.056600214 |
| Bacteria | Cyanobacteria     | Cyanobacteriia      | Chloroplast               | NA                  | NA                       | NA              | ASV585 | 9  | 0.056600214 |
| Bacteria | Patescibacteria   | Saccharimonadia     | Saccharimonadales         | LWQ8                | NA                       | NA              | ASV586 | 9  | 0.056600214 |
| Bacteria | Proteobacteria    | Gammaproteobacteria | Enterobacterales          | Aeromonadaceae      | Oceanisphaera            | NA              | ASV584 | 9  | 0.056600214 |
| Bacteria | Planctomycetota   | Planctomycetes      | Pirellulales              | Pirellulaceae       | Pirellula                | NA              | ASV587 | 9  | 0.056600214 |
| Bacteria | Acidobacteriota   | Blastocatellia      | Pyrinomonadales           | Pyrinomonadaceae    | RB41                     | NA              | ASV583 | 9  | 0.056600214 |
| Bacteria | Proteobacteria    | Alphaproteobacteria | Sphingomonadales          | Sphingomonadaceae   | Sphingomonas             | NA              | ASV289 | 9  | 0.056600214 |
| Bacteria | Proteobacteria    | Alphaproteobacteria | Rhizobiales               | Beijerinckiaceae    | 1174-901-12              | NA              | ASV603 | 8  | 0.050311301 |
| Bacteria | Proteobacteria    | Alphaproteobacteria | Rhizobiales               | Rhizobiaceae        | Pararhizobium-Rhizobium- | etli            | ASV605 | 8  | 0.050311301 |
| Bacteria | Proteobacteria    | Gammaproteobacteria | Xanthomonadales           | Xanthomonadaceae    | Arenimonas               | NA              | ASV609 | 8  | 0.050311301 |
| Bacteria | Acidobacteriota   | Blastocatellia      | Blastocatellales          | Blastocatellaceae   | Blastocatella            | NA              | ASV301 | 8  | 0.050311301 |
| Bacteria | Bacteroidota      | Bacteroidia         | Flavobacteriales          | Flavobacteriaceae   | Flavobacterium           | caeni           | ASV608 | 8  | 0.050311301 |
| Bacteria | Chloroflexi       | Chloroflexia        | Thermomicrobiales         | JG30-KF-CM45        | NA                       | NA              | ASV472 | 8  | 0.050311301 |
| Bacteria | Proteobacteria    | Gammaproteobacteria | Burkholderiales           | Comamonadaceae      | NA                       | NA              | ASV607 | 8  | 0.050311301 |
| Bacteria | Bacteroidota      | Bacteroidia         | Cytophagales              | Spirosomaceae       | Spirosoma                | NA              | ASV604 | 8  | 0.050311301 |
| Bacteria | Proteobacteria    | Gammaproteobacteria | Steroidobacterales        | Steroidobacteraceae | Steroidobacter           | NA              | ASV606 | 8  | 0.050311301 |
| Bacteria | Abditibacteriota  | Abditibacteria      | Abditibacteriales         | Abditibacteriaceae  | Abditibacterium          | NA              | ASV633 | 7  | 0.044022389 |
| Bacteria | Myxococcota       | Polyangia           | Polyangiales              | Polyangiaceae       | Pajaroellobacter         | NA              | ASV630 | 7  | 0.044022389 |
| Bacteria | Bacteroidota      | Bacteroidia         | Cytophagales              | Spirosomaceae       | Persicitalea             | NA              | ASV632 | 7  | 0.044022389 |
| Bacteria | Planctomycetota   | Planctomycetes      | Pirellulales              | Pirellulaceae       | Pir4 lineage             | NA              | ASV634 | 7  | 0.044022389 |
| Bacteria | Proteobacteria    | Gammaproteobacteria | Pseudomonadales           | Pseudomonadaceae    | Pseudomonas              | granadensis     | ASV35  | 7  | 0.044022389 |
| Bacteria | Proteobacteria    | Gammaproteobacteria | Pseudomonadales           | Pseudomonadaceae    | Pseudomonas              | caeni           | ASV635 | 7  | 0.044022389 |

|          |                   |                     |                           |                      |                  |               |        |   |             |
|----------|-------------------|---------------------|---------------------------|----------------------|------------------|---------------|--------|---|-------------|
| Bacteria | Proteobacteria    | Gammaproteobacteria | Burkholderiales           | Alcaligenaceae       | Verticiella      | NA            | ASV631 | 7 | 0.044022389 |
| Bacteria | Bacteroidota      | Bacteroidia         | Flavobacteriales          | Flavobacteriaceae    | Vitellibacter    | NA            | ASV636 | 7 | 0.044022389 |
| Bacteria | Bacteroidota      | Bacteroidia         | Chitinophagales           | Chitinophagaceae     | Flavisolibacter  | NA            | ASV662 | 6 | 0.037733476 |
| Bacteria | Proteobacteria    | Gammaproteobacteria | Burkholderiales           | Oxalobacteraceae     | Massilia         | NA            | ASV233 | 6 | 0.037733476 |
| Bacteria | Bacteroidota      | Bacteroidia         | Chitinophagales           | Chitinophagaceae     | NA               | NA            | ASV665 | 6 | 0.037733476 |
| Bacteria | Cyanobacteria     | Cyanobacteriia      | Chloroplast               | NA                   | NA               | NA            | ASV661 | 6 | 0.037733476 |
| Bacteria | Myxococcota       | Polyangia           | Polyangiales              | Sandaracinaceae      | NA               | NA            | ASV663 | 6 | 0.037733476 |
| Bacteria | Planctomycetota   | Phycisphaerae       | Tepidisphaerales          | WD2101 soil group    | NA               | NA            | ASV659 | 6 | 0.037733476 |
| Bacteria | Proteobacteria    | Gammaproteobacteria | Burkholderiales           | Comamonadaceae       | NA               | NA            | ASV664 | 6 | 0.037733476 |
| Bacteria | Bdellovibrionota  | Bdellovibrionia     | Bacteriovoracales         | Bacteriovoracaceae   | Peredibacter     | starrii       | ASV501 | 6 | 0.037733476 |
| Bacteria | Proteobacteria    | Gammaproteobacteria | Pseudomonadales           | Pseudomonadaceae     | Pseudomonas      | rhizosphaerae | ASV178 | 6 | 0.037733476 |
| Bacteria | Proteobacteria    | Gammaproteobacteria | Xanthomonadales           | Xanthomonadaceae     | Thermomonas      | NA            | ASV660 | 6 | 0.037733476 |
| Bacteria | Proteobacteria    | Alphaproteobacteria | Rhizobiales               | Devosiaceae          | Devosia          | riboflavina   | ASV685 | 5 | 0.031444563 |
| Bacteria | Verrucomicrobiota | Verrucomicrobiae    | Verrucomicrobiales        | Rubritaleaceae       | Luteolibacter    | NA            | ASV519 | 5 | 0.031444563 |
| Bacteria | Bacteroidota      | Bacteroidia         | Flavobacteriales          | NS9 marine group     | NA               | NA            | ASV687 | 5 | 0.031444563 |
| Bacteria | Planctomycetota   | Phycisphaerae       | Tepidisphaerales          | WD2101 soil group    | NA               | NA            | ASV683 | 5 | 0.031444563 |
| Bacteria | Planctomycetota   | Planctomycetes      | Pirellulales              | Pirellulaceae        | NA               | NA            | ASV691 | 5 | 0.031444563 |
| Bacteria | Proteobacteria    | Gammaproteobacteria | Xanthomonadales           | Xanthomonadaceae     | NA               | NA            | ASV689 | 5 | 0.031444563 |
| Bacteria | Proteobacteria    | Gammaproteobacteria | Burkholderiales           | Alcaligenaceae       | Pigmentiphaga    | NA            | ASV684 | 5 | 0.031444563 |
| Bacteria | Acidobacteriota   | Blastocatellia      | Pyrinomonadales           | Pyrinomonadaceae     | RB41             | NA            | ASV686 | 5 | 0.031444563 |
| Bacteria | Bacteroidota      | Bacteroidia         | Chitinophagales           | Chitinophagaceae     | Segetibacter     | NA            | ASV690 | 5 | 0.031444563 |
| Bacteria | Verrucomicrobiota | Verrucomicrobiae    | Verrucomicrobiales        | Verrucomicrobiaceae  | Verrucomicrobium | NA            | ASV688 | 5 | 0.031444563 |
| Bacteria | Verrucomicrobiota | Verrucomicrobiae    | Chthoniobacterales        | Chthoniobacteraceae  | Chthoniobacter   | NA            | ASV717 | 4 | 0.025155651 |
| Bacteria | Proteobacteria    | Gammaproteobacteria | Pseudomonadales           | Halomonadaceae       | Halomonas        | NA            | ASV710 | 4 | 0.025155651 |
| Bacteria | Acidobacteriota   | Vicinamibacteria    | Vicinamibacterales        | Vicinamibacteraceae  | Luteitalea       | NA            | ASV715 | 4 | 0.025155651 |
| Bacteria | Proteobacteria    | Gammaproteobacteria | Xanthomonadales           | Xanthomonadaceae     | Lysobacter       | NA            | ASV722 | 4 | 0.025155651 |
| Bacteria | Acidobacteriota   | Vicinamibacteria    | Vicinamibacterales        | Vicinamibacteraceae  | NA               | NA            | ASV711 | 4 | 0.025155651 |
| Bacteria | Actinobacteriota  | Thermoleophilia     | Solirubrobacterales       | Solirubrobacteraceae | NA               | NA            | ASV721 | 4 | 0.025155651 |
| Bacteria | Patescibacteria   | Parcubacteria       | Candidatus Kaiserbacteria | NA                   | NA               | NA            | ASV713 | 4 | 0.025155651 |
| Bacteria | Patescibacteria   | Parcubacteria       | Candidatus Kaiserbacteria | NA                   | NA               | NA            | ASV718 | 4 | 0.025155651 |
| Bacteria | Planctomycetota   | Phycisphaerae       | Tepidisphaerales          | NA                   | NA               | NA            | ASV719 | 4 | 0.025155651 |
| Bacteria | Proteobacteria    | Alphaproteobacteria | Rickettsiales             | Mitochondria         | NA               | NA            | ASV714 | 4 | 0.025155651 |
| Bacteria | Proteobacteria    | Gammaproteobacteria | Burkholderiales           | Oxalobacteraceae     | NA               | NA            | ASV712 | 4 | 0.025155651 |

|          |                   |                     |                     |                        |                              |              |        |   |             |
|----------|-------------------|---------------------|---------------------|------------------------|------------------------------|--------------|--------|---|-------------|
| Bacteria | Myxococcota       | Polyangia           | Polyangiales        | Polyangiaceae          | Pajaroellobacter             | NA           | ASV720 | 4 | 0.025155651 |
| Bacteria | Verrucomicrobiota | Verrucomicrobiae    | Verrucomicrobiales  | Verrucomicrobiaceae    | Prostheco bacter             | NA           | ASV709 | 4 | 0.025155651 |
| Bacteria | Planctomycetota   | Planctomycetes      | Planctomycetales    | Rubinisphaeraceae      | SH-PL14                      | NA           | ASV716 | 4 | 0.025155651 |
| Bacteria | Bacteroidota      | Bacteroidia         | Cytophagales        | Hymenobacteraceae      | Adhaeribacter                | NA           | ASV755 | 3 | 0.018866738 |
| Bacteria | Verrucomicrobiota | Verrucomicrobiae    | Chthoniobacterales  | Xiphinematobacteraceae | Candidatus Xiphinematobacter | NA           | ASV756 | 3 | 0.018866738 |
| Bacteria | Gemmatimonadota   | Gemmatimonadetes    | Gemmatimonadales    | Gemmatimonadaceae      | Gemmatimonas                 | NA           | ASV759 | 3 | 0.018866738 |
| Bacteria | Proteobacteria    | Gammaproteobacteria | Xanthomonadales     | Xanthomonadaceae       | Luteimonas                   | NA           | ASV750 | 3 | 0.018866738 |
| Bacteria | Proteobacteria    | Gammaproteobacteria | Xanthomonadales     | Xanthomonadaceae       | Lysobacter                   | NA           | ASV748 | 3 | 0.018866738 |
| Bacteria | Actinobacteriota  | Thermoleophilia     | Solirubrobacterales | 67-14                  | NA                           | NA           | ASV749 | 3 | 0.018866738 |
| Bacteria | Armatimonadota    | Fimbriimonadia      | Fimbriimonadales    | Fimbriimonadaceae      | NA                           | NA           | ASV757 | 3 | 0.018866738 |
| Bacteria | Bacteroidota      | Bacteroidia         | Cytophagales        | Microscillaceae        | NA                           | NA           | ASV753 | 3 | 0.018866738 |
| Bacteria | Bacteroidota      | Bacteroidia         | Flavobacteriales    | Flavobacteriaceae      | NA                           | NA           | ASV752 | 3 | 0.018866738 |
|          |                   |                     | Candidatus          |                        |                              |              |        |   |             |
| Bacteria | Patescibacteria   | Parcubacteria       | Nomurabacteria      | NA                     | NA                           | NA           | ASV758 | 3 | 0.018866738 |
| Bacteria | Bacteroidota      | Bacteroidia         | Sphingobacteriales  | Sphingobacteriaceae    | Pedobacter                   | NA           | ASV754 | 3 | 0.018866738 |
| Bacteria | Proteobacteria    | Gammaproteobacteria | Pseudomonadales     | Pseudomonadaceae       | Pseudomonas                  | azotoformans | ASV10  | 3 | 0.018866738 |
| Bacteria | Proteobacteria    | Gammaproteobacteria | Pseudomonadales     | Pseudomonadaceae       | Pseudomonas                  | NA           | ASV751 | 3 | 0.018866738 |
| Bacteria | Bacteroidota      | Bacteroidia         | Cytophagales        | Spirosomaceae          | Spirosoma                    | NA           | ASV747 | 3 | 0.018866738 |
| Bacteria | Patescibacteria   | Saccharimonadia     | Saccharimonadales   | Saccharimonadaceae     | TM7a                         | NA           | ASV746 | 3 | 0.018866738 |
| Bacteria | Bdellovibrionota  | Bdellovibrionia     | Bdellovibrionales   | Bdellovibrionaceae     | Bdellovibrio                 | NA           | ASV780 | 2 | 0.012577825 |
| Bacteria | Bacteroidota      | Rhodothermia        | Rhodothermales      | Rhodothermaceae        | NA                           | NA           | ASV776 | 2 | 0.012577825 |
| Bacteria | Gemmatimonadota   | Longimicrobia       | Longimicrobiales    | Longimicrobiaceae      | NA                           | NA           | ASV781 | 2 | 0.012577825 |
| Bacteria | Proteobacteria    | Alphaproteobacteria | Reyranellales       | Reyranellaceae         | NA                           | NA           | ASV777 | 2 | 0.012577825 |
| Bacteria | Proteobacteria    | Alphaproteobacteria | Rickettsiales       | Candidatus Jidaibacter | NA                           | NA           | ASV778 | 2 | 0.012577825 |
| Bacteria | Actinobacteriota  | Actinobacteria      | Propionibacteriales | Nocardiodaceae         | Nocardioides                 | NA           | ASV779 | 2 | 0.012577825 |
| Bacteria | Proteobacteria    | Gammaproteobacteria | Enterobacterales    | Erwiniaceae            | Pantoea                      | vagans       | ASV87  | 2 | 0.012577825 |
| Bacteria | Proteobacteria    | Gammaproteobacteria | Xanthomonadales     | Xanthomonadaceae       | Thermomonas                  | NA           | ASV782 | 2 | 0.012577825 |
| Bacteria | Proteobacteria    | Gammaproteobacteria | Burkholderiales     | Comamonadaceae         | Xylophilus                   | NA           | ASV783 | 2 | 0.012577825 |
| Bacteria | Proteobacteria    | Gammaproteobacteria | Xanthomonadales     | Xanthomonadaceae       | Luteimonas                   | NA           | ASV820 | 1 | 0.006288913 |
| Bacteria | Proteobacteria    | Gammaproteobacteria | Burkholderiales     | Oxalobacteraceae       | Massilia                     | NA           | ASV824 | 1 | 0.006288913 |
| Bacteria | Acidobacteriota   | Vicinamibacteria    | Vicinamibacterales  | Vicinamibacteraceae    | NA                           | NA           | ASV819 | 1 | 0.006288913 |
| Bacteria | Myxococcota       | Polyangia           | Polyangiales        | Sandaracinaceae        | NA                           | NA           | ASV827 | 1 | 0.006288913 |
| Bacteria | Proteobacteria    | Gammaproteobacteria | Burkholderiales     | Comamonadaceae         | NA                           | NA           | ASV817 | 1 | 0.006288913 |

|          |                |                     |                 |                  |               |    |        |   |             |
|----------|----------------|---------------------|-----------------|------------------|---------------|----|--------|---|-------------|
| Bacteria | Proteobacteria | Gammaproteobacteria | Burkholderiales | Comamonadaceae   | NA            | NA | ASV823 | 1 | 0.006288913 |
| Bacteria | Proteobacteria | Gammaproteobacteria | Burkholderiales | Comamonadaceae   | NA            | NA | ASV825 | 1 | 0.006288913 |
| Bacteria | Proteobacteria | Gammaproteobacteria | Xanthomonadales | Xanthomonadaceae | NA            | NA | ASV822 | 1 | 0.006288913 |
| Bacteria | Proteobacteria | Gammaproteobacteria | Burkholderiales | Alcaligenaceae   | Pigmentiphaga | NA | ASV826 | 1 | 0.006288913 |
| Bacteria | Proteobacteria | Gammaproteobacteria | Burkholderiales | Comamonadaceae   | Rhodoferax    | NA | ASV818 | 1 | 0.006288913 |
| Bacteria | Bacteroidota   | Bacteroidia         | Chitinophagales | Chitinophagaceae | Segetibacter  | NA | ASV821 | 1 | 0.006288913 |
| Bacteria | Proteobacteria | Gammaproteobacteria | Burkholderiales | Comamonadaceae   | Variovorax    | NA | ASV465 | 1 | 0.006288913 |

Table S5. Levels of bioaerosols detected by stationary sampling. Concentrations are expressed in CFU m<sup>-3</sup>

| Site | Season | Mould                 | Mesophilic bacteria   | Type of sample         |
|------|--------|-----------------------|-----------------------|------------------------|
| 1    | autumn | 3 x 10 <sup>3</sup>   | 1.6 x 10 <sup>2</sup> | ambient air            |
| 1    | autumn | 6 x 10 <sup>3</sup>   | 5 x 10 <sup>3</sup>   | during blowing         |
| 1    | autumn | 1 x 10 <sup>4</sup>   | 5 x 10 <sup>3</sup>   | during blowing         |
| 2    | autumn | 1.5 x 10 <sup>3</sup> | 1.2 x 10 <sup>2</sup> | ambient air            |
| 2    | autumn | 1 x 10 <sup>4</sup>   | 1 x 10 <sup>3</sup>   | during blowing         |
| 2    | autumn | 1 x 10 <sup>4</sup>   | 5 x 10 <sup>3</sup>   | during blowing         |
| 2    | autumn | 1 x 10 <sup>4</sup>   | 6 x 10 <sup>3</sup>   | during blowing         |
| 1    | winter | 4.5 x 10 <sup>2</sup> | 5.5 x 10 <sup>2</sup> | ambient air            |
| 1    | winter | 1.6 x 10 <sup>4</sup> | 5.2 x 10 <sup>3</sup> | during blowing         |
| 1    | winter | 1.4 x 10 <sup>4</sup> | 5.1 x 10 <sup>3</sup> | during blowing         |
| 2    | winter | 2.8 x 10 <sup>3</sup> | 6.5 x 10 <sup>2</sup> | ambient air            |
| 2    | winter | 3.0 x 10 <sup>4</sup> | 9.7 x 10 <sup>3</sup> | during blowing         |
| 1    | spring | 2.5 x 10 <sup>2</sup> | 9.0 x 10 <sup>1</sup> | ambient air            |
| 1    | spring | 2.2 x 10 <sup>4</sup> | 2.2 x 10 <sup>3</sup> | during blowing         |
| 1    | spring | 6.2 x 10 <sup>3</sup> | 1.1 x 10 <sup>4</sup> | during blowing         |
| 2    | spring | 4.6 x 10 <sup>2</sup> | 2.5 x 10 <sup>1</sup> | ambient air            |
| 2    | spring | 2.2 x 10 <sup>4</sup> | 1.0 x 10 <sup>3</sup> | during blowing         |
| 2    | spring | 5.3 x 10 <sup>3</sup> | 1.3 x 10 <sup>3</sup> | during blowing         |
| 1    | summer | 1.4 x 10 <sup>3</sup> | 1.6 x 10 <sup>1</sup> | ambient air            |
| 1    | summer | 3.9 x 10 <sup>3</sup> | 4.0 x 10 <sup>3</sup> | during water jet usage |

|   |        |                   |                   |                        |
|---|--------|-------------------|-------------------|------------------------|
| 1 | summer | $5.4 \times 10^3$ | $3.6 \times 10^3$ | during water jet usage |
| 1 | summer | $4.2 \times 10^3$ | $3.3 \times 10^3$ | during water jet usage |
| 1 | summer | $1.3 \times 10^3$ | $6.0 \times 10^2$ | during water jet usage |
| 2 | summer | $1.3 \times 10^3$ | $9.0 \times 10^1$ | ambient air            |
| 2 | summer | $1.8 \times 10^4$ | $1.6 \times 10^4$ | during water jet usage |
| 2 | summer | $2.2 \times 10^4$ | $5.0 \times 10^3$ | during water jet usage |
| 2 | summer | $1.0 \times 10^4$ | $5.3 \times 10^3$ | during water jet usage |
| 2 | summer | $1.6 \times 10^4$ | $1.3 \times 10^4$ | during water jet usage |

---
